# Supplementary material for: Polyethylene glycol as a robust, biocompatible encapsulant for two-stage treatment of food and beverage wastewater
Source: Royal Society of Chemistry journal article supplement (doi:10.1039/d3ew00633f), 2023-12-05
Supplement: d3ew00633f1.pdf [file d3ew00633f1.pdf]

1 **Polyethylene glycol as a robust, biocompatible encapsulant**

2 **for two-stage treatment of food and beverage wastewater**

3

4 Gretchen M. Gutenberger, Olivia M. Holgate, William A. Arnold, Jeremy S. Guest, Paige J.

5

Novak

6

7

8

9

Supporting Information

10

11

12 **Methodology**

13 **Table S1.** *Formulation of high-strength synthetic wastewater in DI water<sup>1</sup>*

| Reagent             | Concentration (g/L) |
|---------------------|---------------------|
| Polysorbate         | 0.96                |
| Gelatin             | 3.75                |
| Starch              | 1.75                |
| Casamino acids      | 0.08                |
| Yeast extract       | 0.08                |
| Ammonium chloride   | 0.15                |
| Sodium bicarbonate  | 0.10                |
| Sodium phosphate    | 0.03                |
| Potassium phosphate | 0.03                |
| Magnesium chloride  | 0.04                |
| Calcium chloride    | 0.06                |

14

15

16

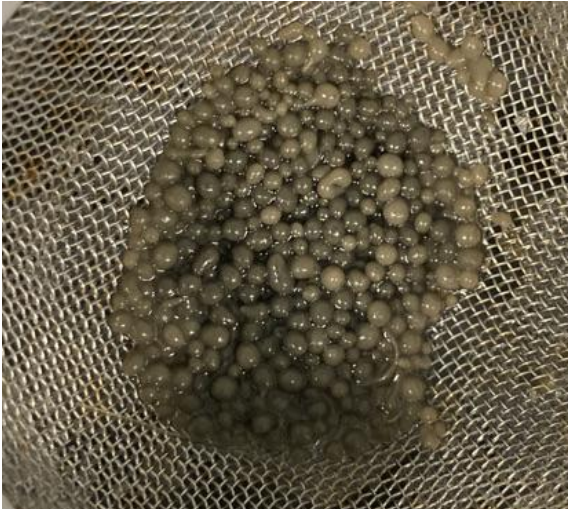

(a)

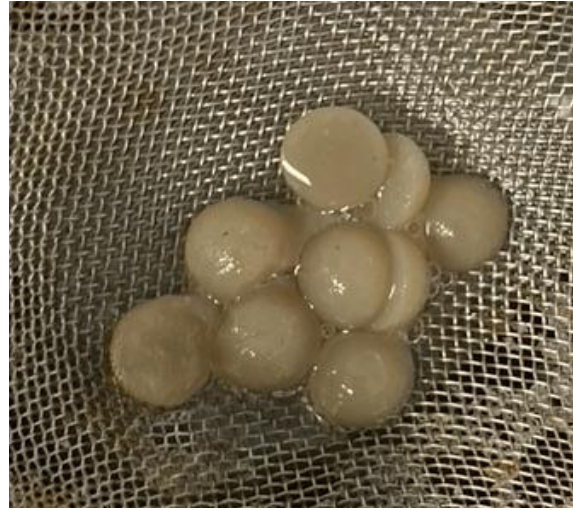

(b)

17 **Figure S1.** *Alginate beads (a) and PEG beads (b) containing fermentative bacteria were approximately 2*  
18 *mm and 10 mm in diameter, respectively.*

19

20

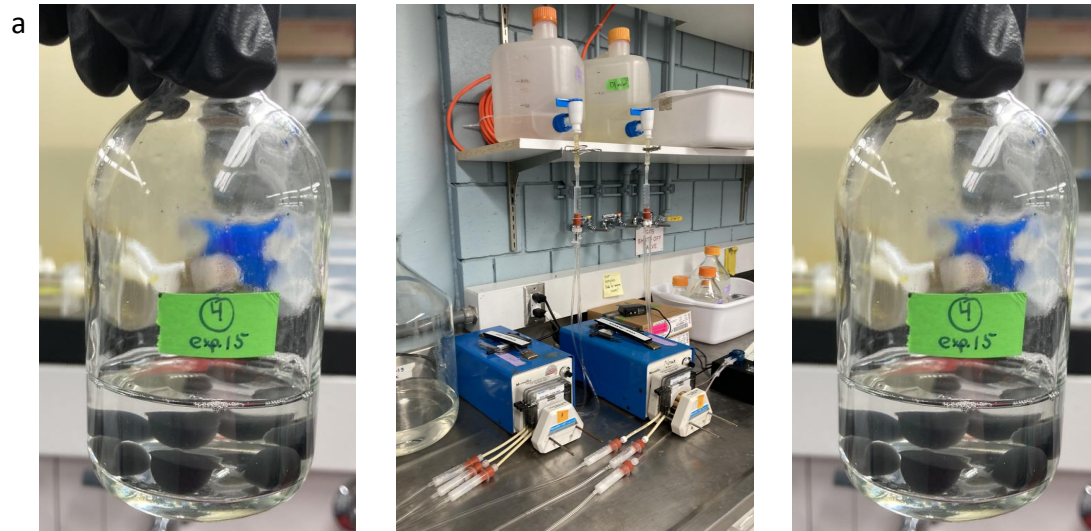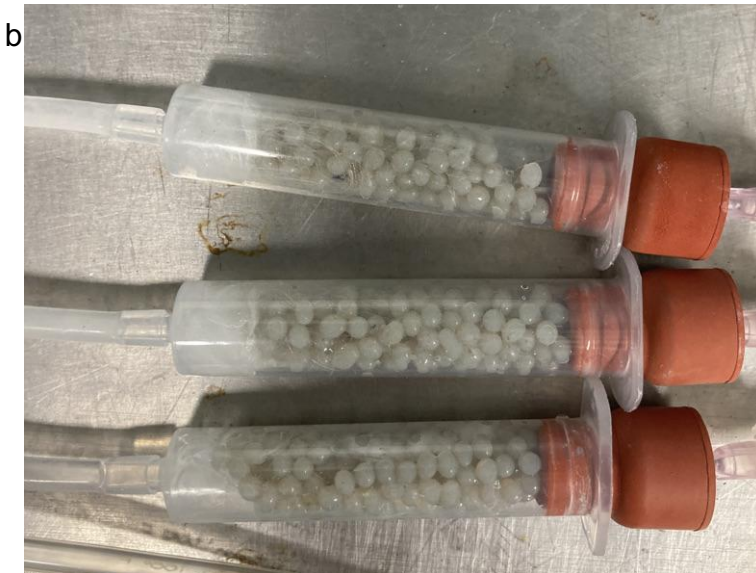

21

22 **Figure S2.** Photos of (a) the three-stage system of reactors used to assess bead integrity, with a close-up  
23 (b) of alginate beads in the 7-mL flow-through reactor. Data collection from the first and third stages  
24 included intact bead count, encapsulated biomass concentration as protein, and gas production.

25

26

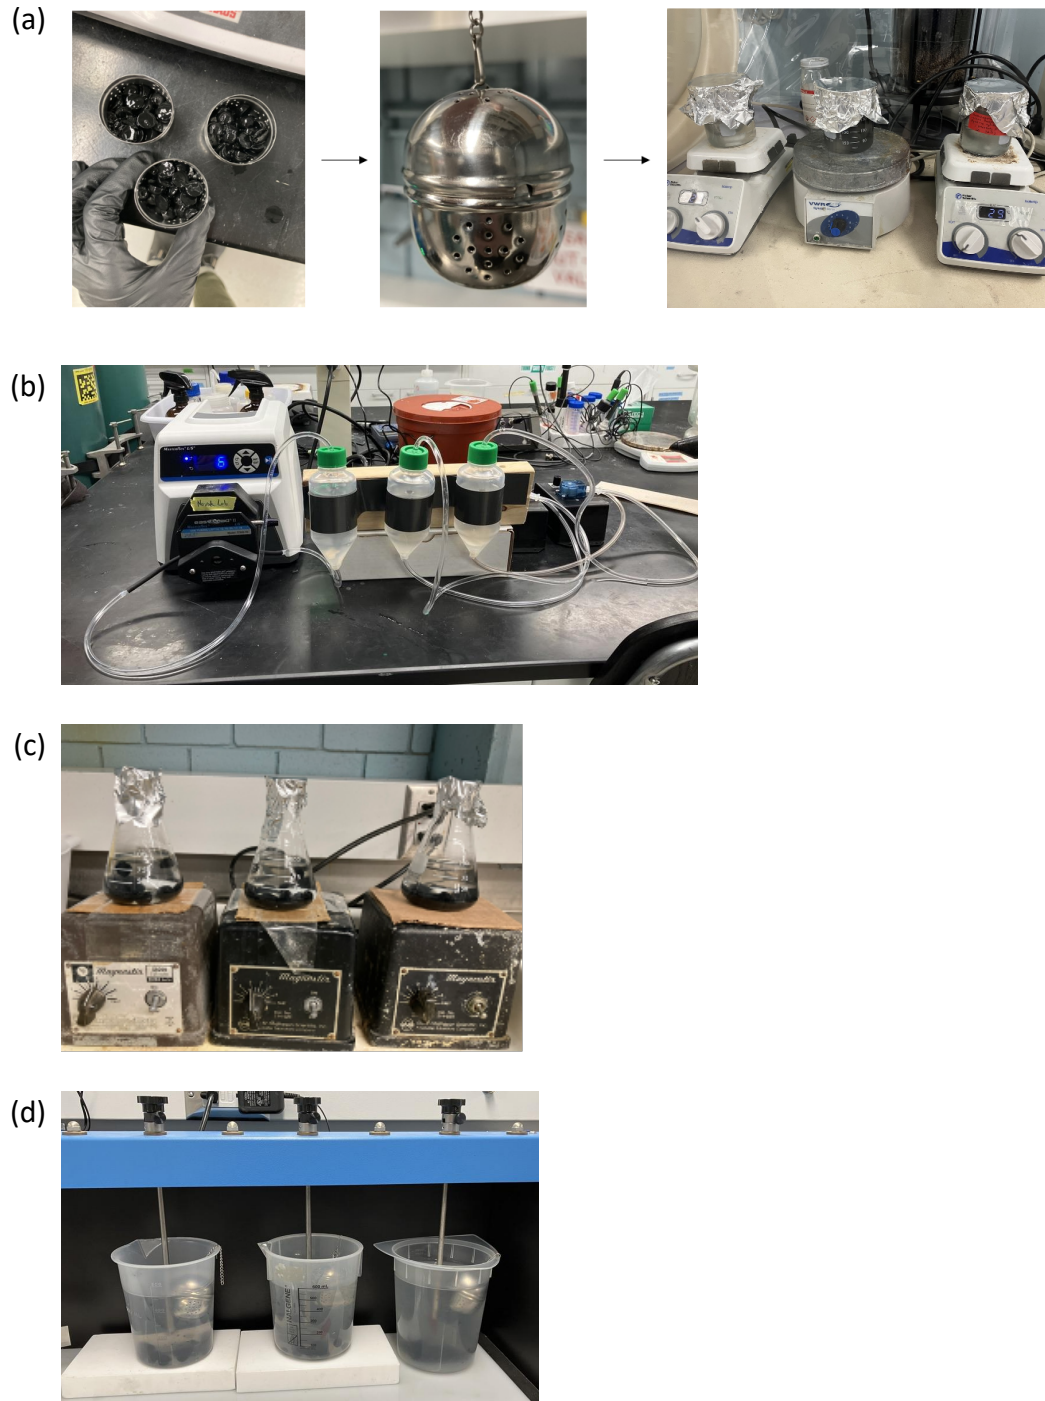

27 **Figure S3.** Caged (a) and upflow (b) second-stage reactors were used to assess the impact of reactor  
 28 conditions on the longevity of PEG beads encapsulating PAC-supported biofilms in a three-stage  
 29 experimental set-up. Stirred (c) and impeller (d) reactor experiments were also performed with PEG  
 30 beads encapsulating PAC-supported biofilms. Note: the tea balls shown in panel d were not filled with

31 *encapsulated organisms; they were simply placed in the jar tester to determine if this set-up would work*  
32 *in future experiments.*

33

## 34 **Results and Discussion**

35

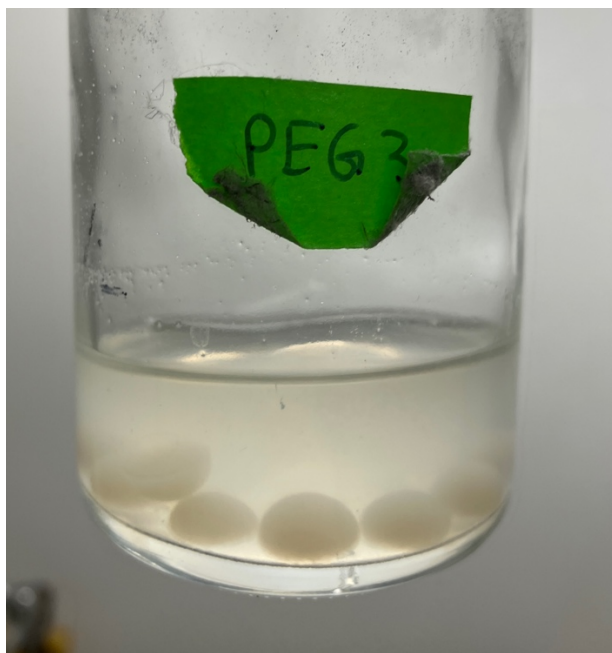

36

37 **Figure S4.** *After 10 months in shaken batch reactors, PEG beads have retained their shape and show no*  
38 *physical signs of deterioration.*

39



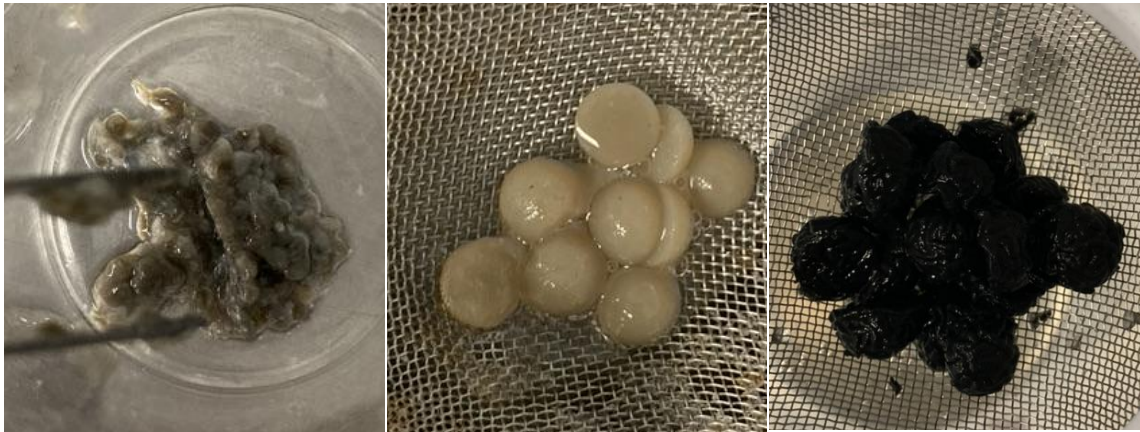

(a)

(b)

(c)

41 **Figure S5.** Alginate beads (a), PEG beads encapsulating suspended biomass (b), and PEG beads  
 42 encapsulating PAC-supported biofilms (c) after one month of operation in the three-stage reactor set-up,  
 43 photographed after the third stage.

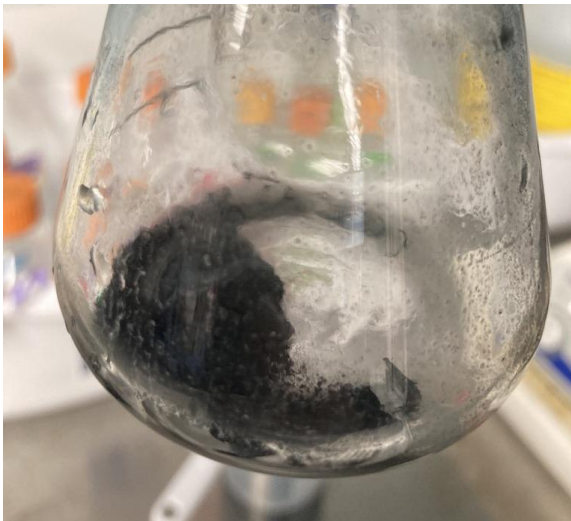

(a)

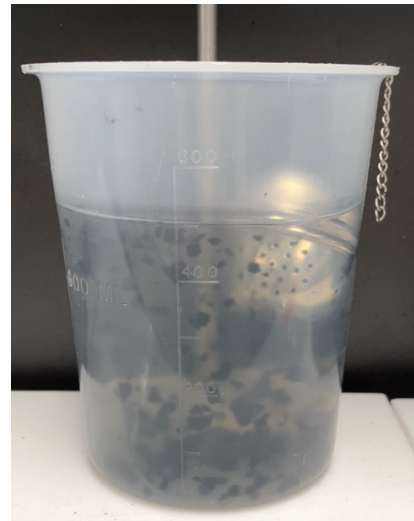

(b)

44 **Figure S6.** After two weeks in a stirred reactor with heat, PEG beads encapsulating PAC-supported  
 45 biofilms completely disintegrated (a), while after two weeks in an impeller-stirred reactor, PEG beads  
 46 encapsulating PAC-supported biofilms broke into small pieces (b). Note: the tea ball shown in panel b

47 *was not filled with encapsulated organisms; it was simply placed in the jar tester to determine if this set-*  
48 *up would work in future experiments.*

49

50

51 **References**

52 1. K. Zhu, C. W. Davis, P. J. Novak and W. A. Arnold, *Bioresource Technology Reports*, 2020,  
53 **11**, 100451.

54
